# Supplementary material
Source: PubMed Central journal article supplement (PMC1354196)

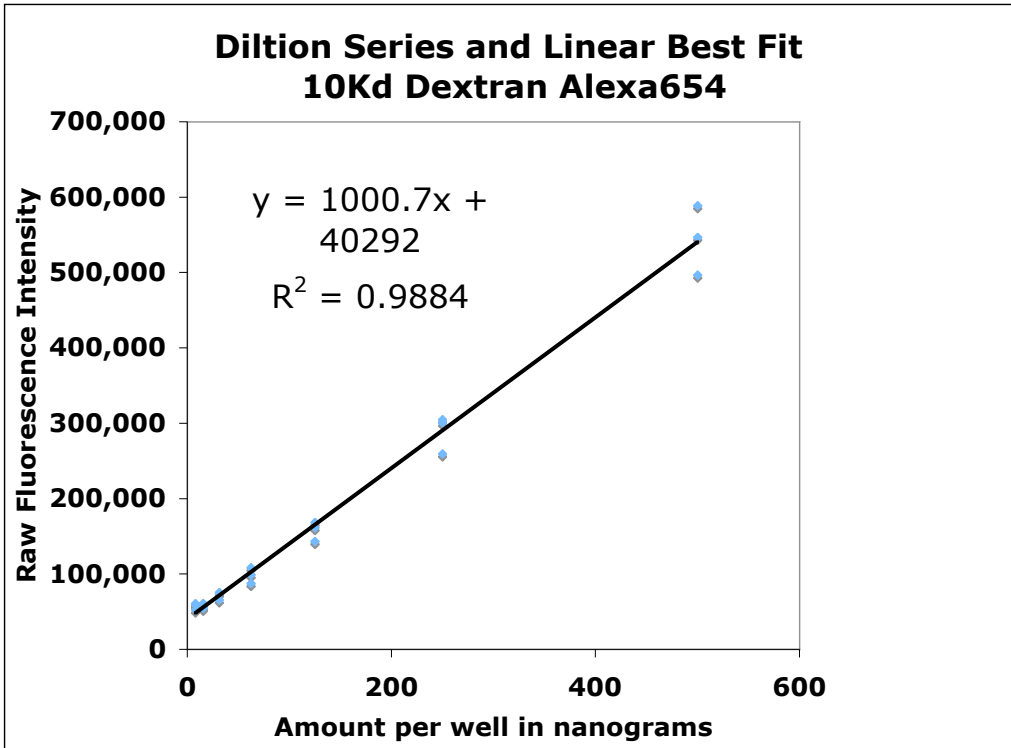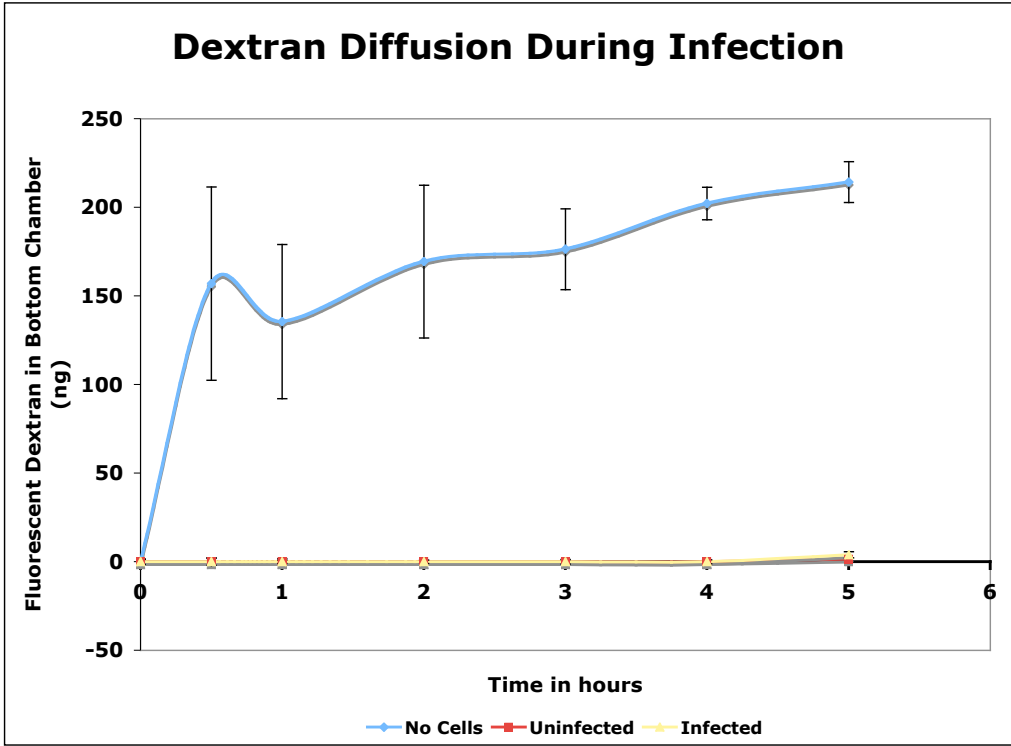

Supplement: ppat.0020003.sg001.pdf [file ppat.0020003.sg001.pdf]
